# Supplementary material
Source: PubMed Central journal article supplement (PMC3277569)
Supplement: 1115725109_Appendix.pdf [file 1115725109_Appendix.pdf]

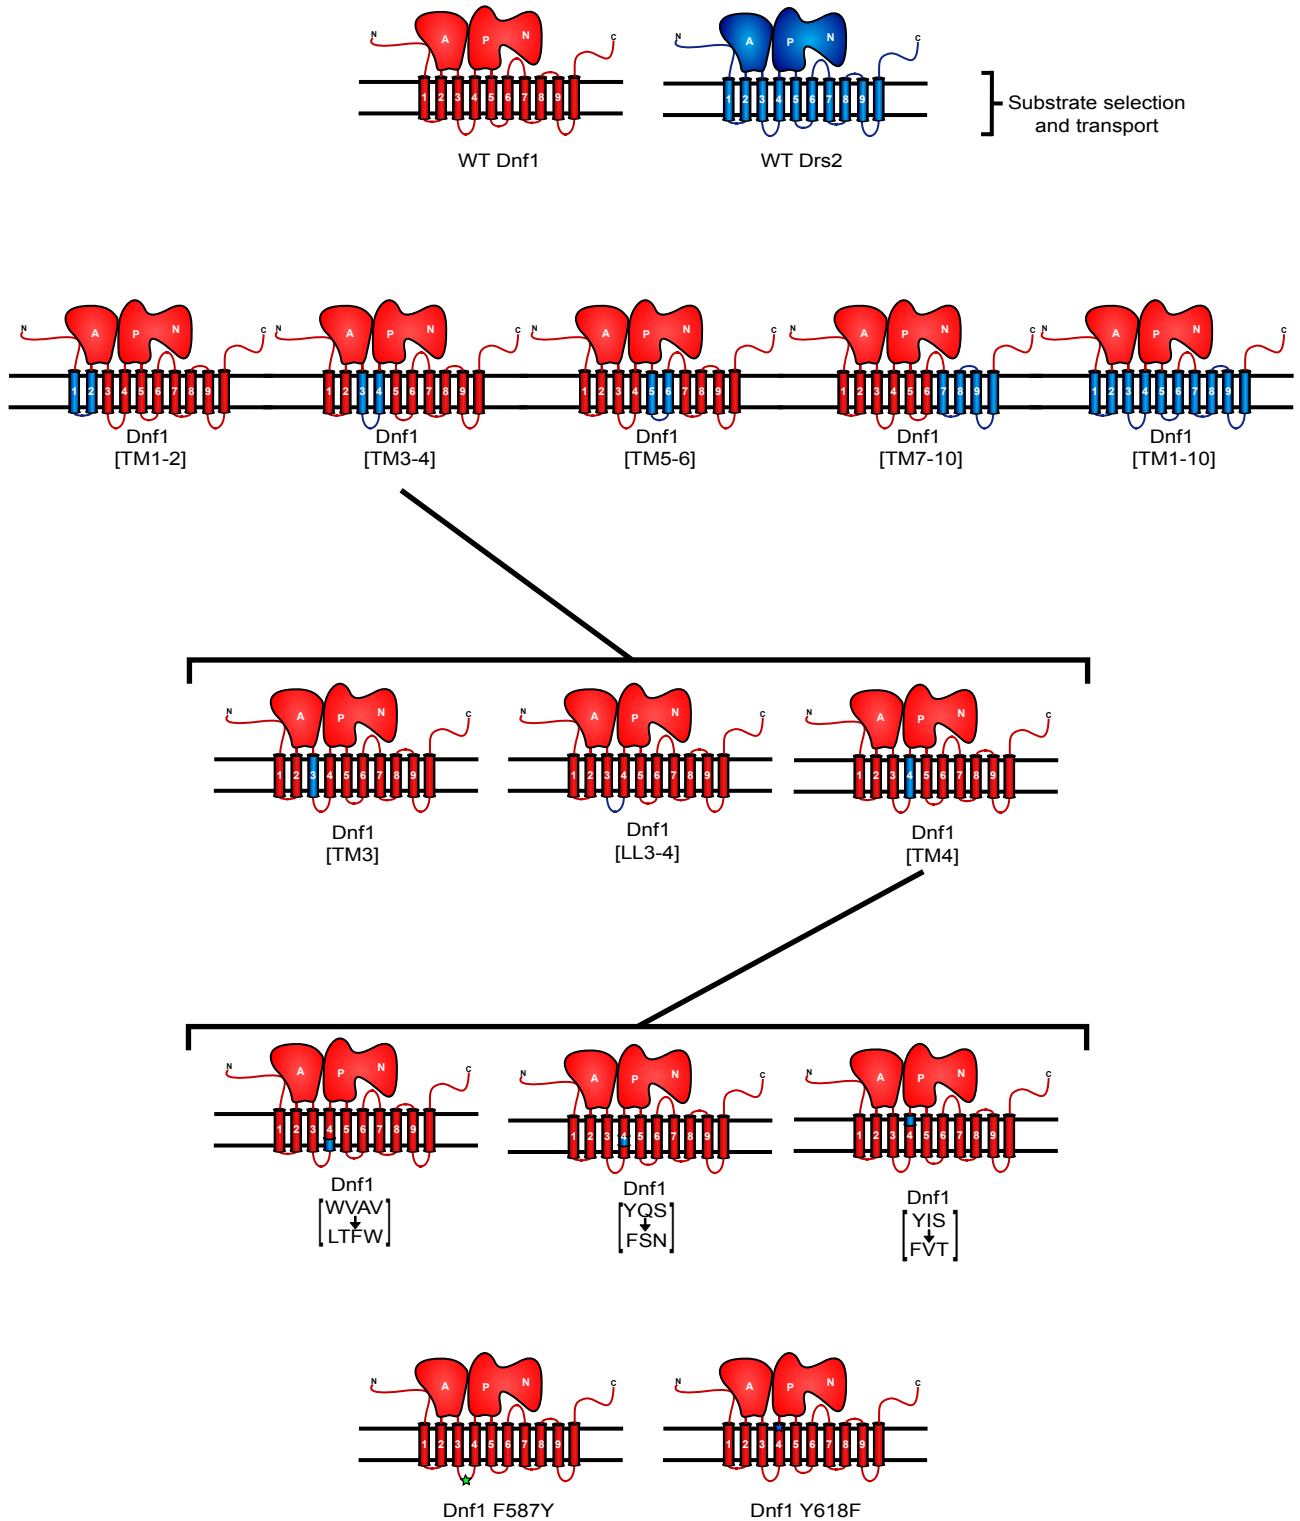

**Figure S1.** Topological diagrams of WT Dnf1 (red), WT Drs2 (blue) and most of the chimeras reported in this study. Black lines are membrane boundaries. A is the actuator domain, N is the nucleotide binding domain and P is the phosphorylation domain.

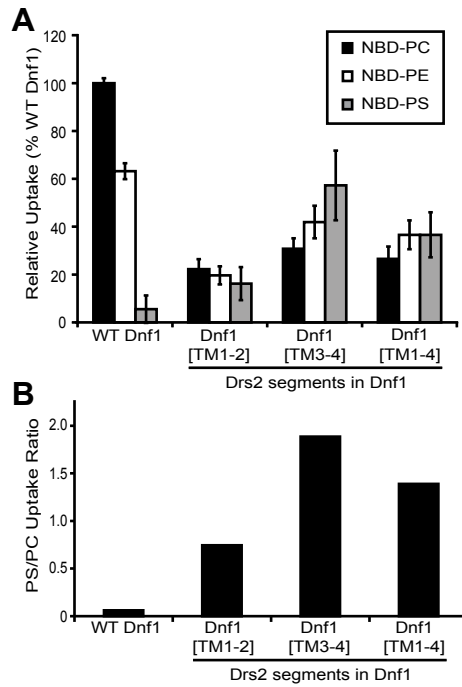

**Figure S2.** Activity and specificity of Dnf1[TM1-4]. (A) NBD-PC and NBD-PE uptake by Dnf1[TM1-4] is similar to Dnf1[TM3-4], but NBD-PS activity is slightly reduced. (B) The specificity of Dnf1[TM1-4] for PS is also slightly reduced relative to Dnf1[TM3-4], suggesting TM3-4 has the greatest impact on PS specificity.

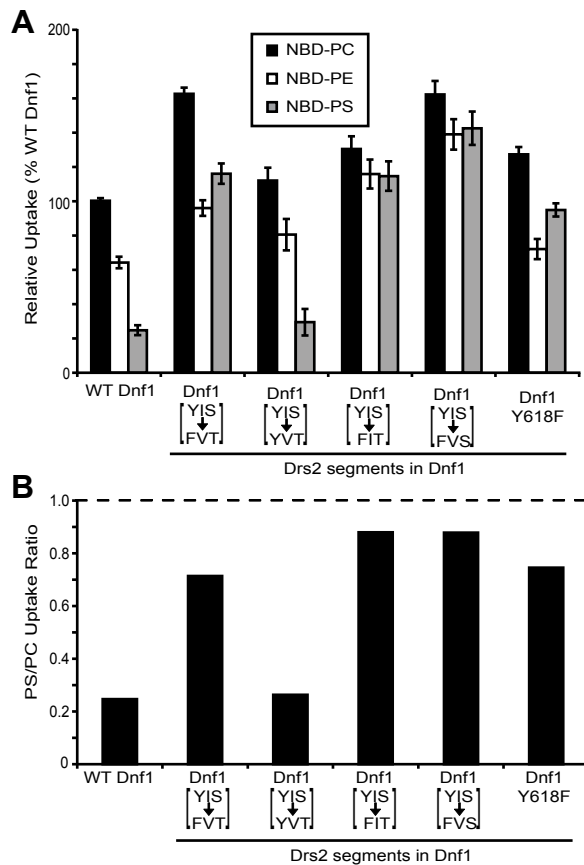

**Figure S3.** The enhanced uptake for all three substrates noted for Dnf1[YIS->FVT] was also observed for Dnf1[YI->FV]. (A) Exchanging Y618F, I619V, and S620T in pairs reveals the enhanced activity seen in Dnf1[YIS->FVT] is dependent on both Y618F and I619V. (B) Each pairwise combination of changes containing Y618F results in a specificity for PS comparable to the Y618F point mutation.

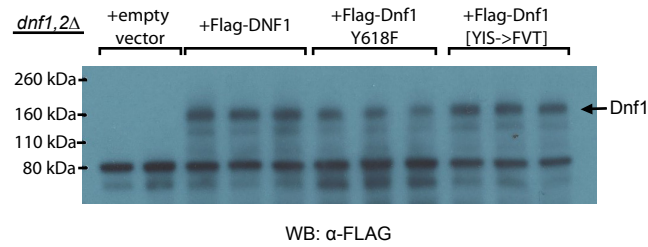

**Figure S4.** Expression levels of Flag-Dnf1, Flag-Dnf1[YIS->FVT] and Flag-Dnf1 Y618F are similar.

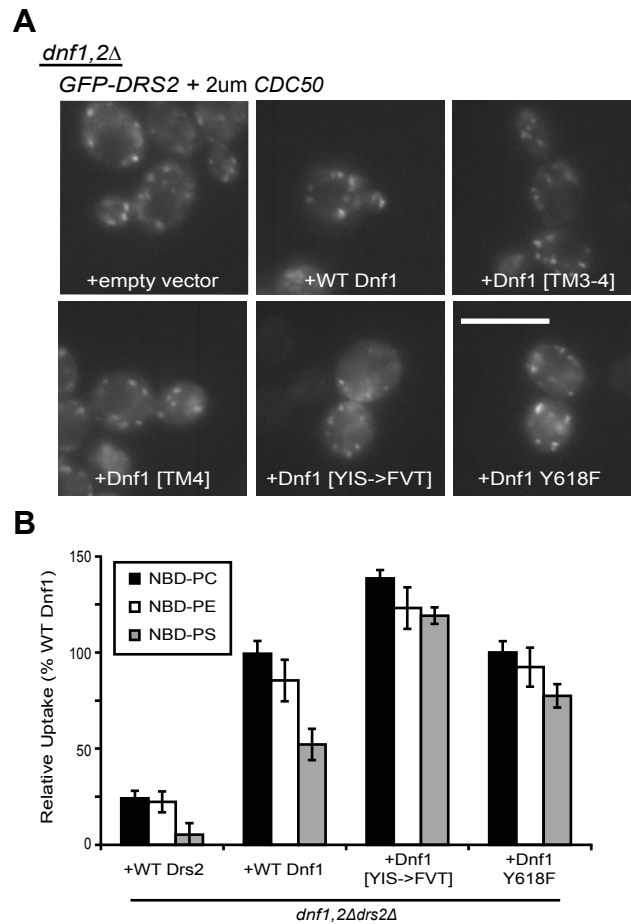

**Figure S5.** The PS uptake observed in Dnf1[Drs2] chimeras is not attributable to Drs2 (A) Localization of N-terminal GFP fused Drs2 does not change in the presence Dnf1[Drs2] chimeras in *S. cerevisiae*. The scale bar is 10μm. (B) NBD-PL uptake observed by Dnf1[Drs2] chimeras in a *dnf1,2Δdrs2Δ* strain demonstrated the uptake activity was independent of Drs2.

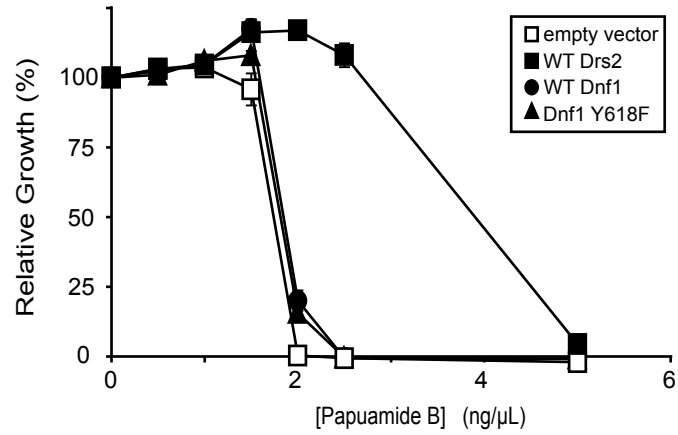

**Figure S6.** Dnf1 Y618F is unable to suppress the PapB hypersensitivity of the *drs2Δ* strain.

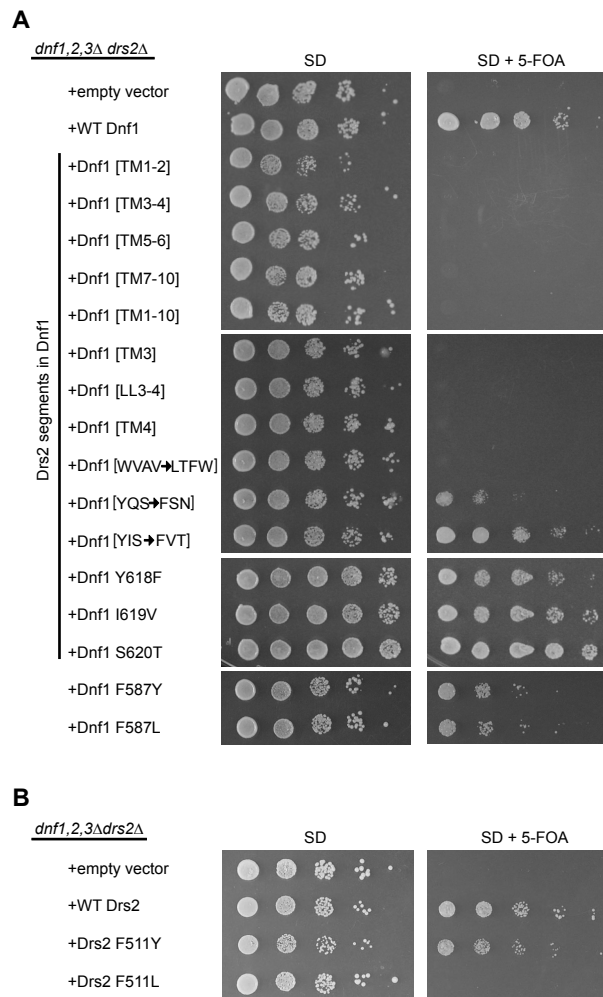

**Figure S7.** Complementation of *dnf1,2,3Δ drs2Δ* by *DNF1[DRS2]* chimeric genes. (A) Serial dilutions of strains harboring *DNF1[DRS2]* chimeric genes were plated on synthetic medium (left) or synthetic medium containing 5-FOA (right), which is lethal to cells expressing *URA3*. Growth on 5-FOA indicates the Dnf1[DRS2] chimera is capable of complementing the growth defect of the *dnf1,2,3Δ drs2Δ* strain in the absence of the covering *URA3-DRS2* plasmid. (A) Serial dilutions of strains harboring *DRS2[DNF1]* chimeric genes

**A**

|                                        |             |   |         |
|----------------------------------------|-------------|---|---------|
|                                        |             | ↓ | +4<br>↓ |
| Drs2                                   | LTFWILFSNLV | P | I       |
| Dnf1                                   | WVAVILYQSLV | P | I       |
| Ca <sup>2+</sup> ATPase                | KIAVALAVAAI | P | I       |
| Na <sup>+</sup> /K <sup>+</sup> ATPase | IFLIGIIVANV | P | I       |
| H <sup>+</sup> ATPase                  | DNLLVLLIGGI | P | I       |
|                                        |             | F | F       |
|                                        |             | V | V       |
|                                        |             | T | T       |
|                                        |             | V | V       |
|                                        |             | E | E       |
|                                        |             | L | L       |
|                                        |             | I | I       |
|                                        |             | S | S       |
|                                        |             | L | L       |
|                                        |             | V | V       |
|                                        |             | T | T       |
|                                        |             | V | V       |
|                                        |             | E | E       |
|                                        |             | L | L       |
|                                        |             | I | I       |
|                                        |             | K | K       |
|                                        |             | I | I       |
|                                        |             | E | E       |
|                                        |             | I | I       |
|                                        |             | S | S       |
|                                        |             | V | V       |
|                                        |             | E | E       |
|                                        |             | L | L       |
|                                        |             | I | I       |
|                                        |             | T | T       |
|                                        |             | T | T       |
|                                        |             | C | C       |
|                                        |             | L | L       |
|                                        |             | L | L       |
|                                        |             | I | I       |
|                                        |             | G | G       |
|                                        |             | G | G       |
|                                        |             | I | I       |
|                                        |             | P | P       |
|                                        |             | I | I       |
|                                        |             | A | A       |
|                                        |             | M | M       |
|                                        |             | P | P       |
|                                        |             | T | T       |
|                                        |             | V | V       |
|                                        |             | L | L       |
|                                        |             | S | S       |
|                                        |             | V | V       |
|                                        |             | T | T       |
|                                        |             | M | M       |

**B**

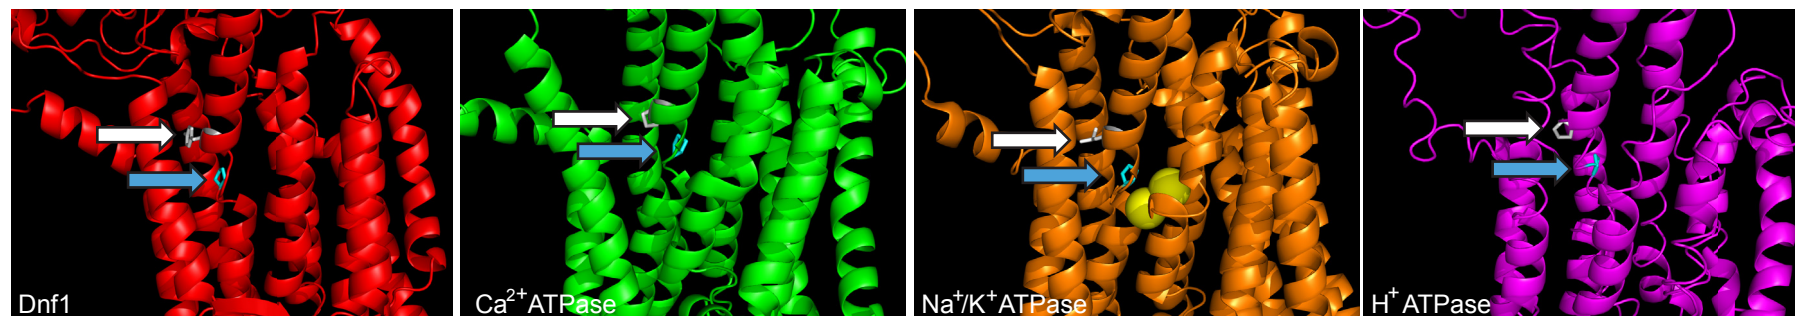

**C**

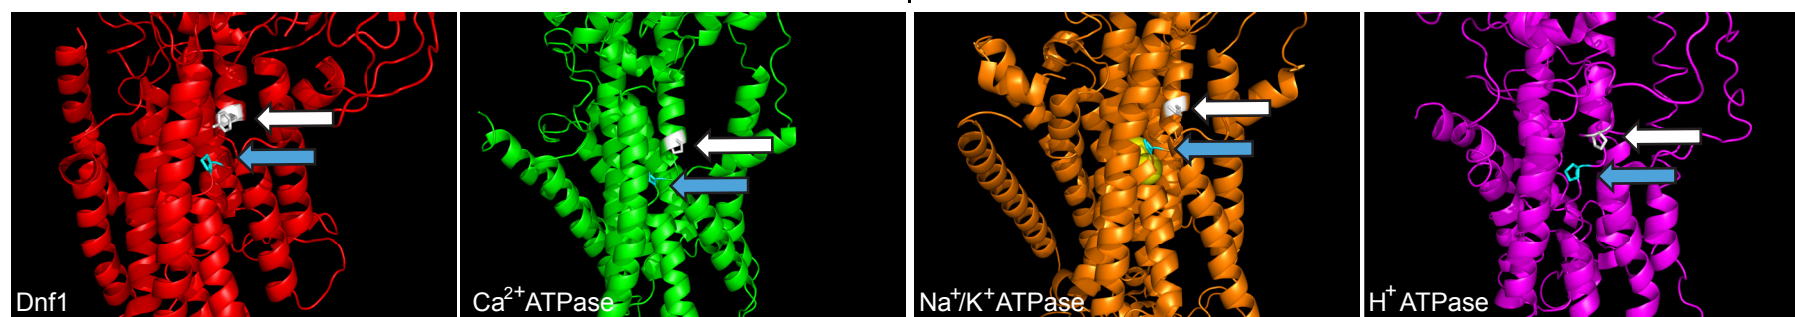

**Figure S8.** Structural conservation of the P-type ATPase TM domain. (A) Sequence alignment of TM4 of P4-ATPases Dnf1 and Drs2 with crystalized P-type ATPases. (B, C) Comparison of the conserved proline (blue arrow), and “proline plus 4” position (white arrow) between each crystal structure and the structural model of Dnf1. The crystal structures used in this image are: SERCA PBD 2AGV, Na<sup>+</sup>/K<sup>+</sup>ATPase PBD 2ZXE, H<sup>+</sup>ATPase PBD 3B8C.



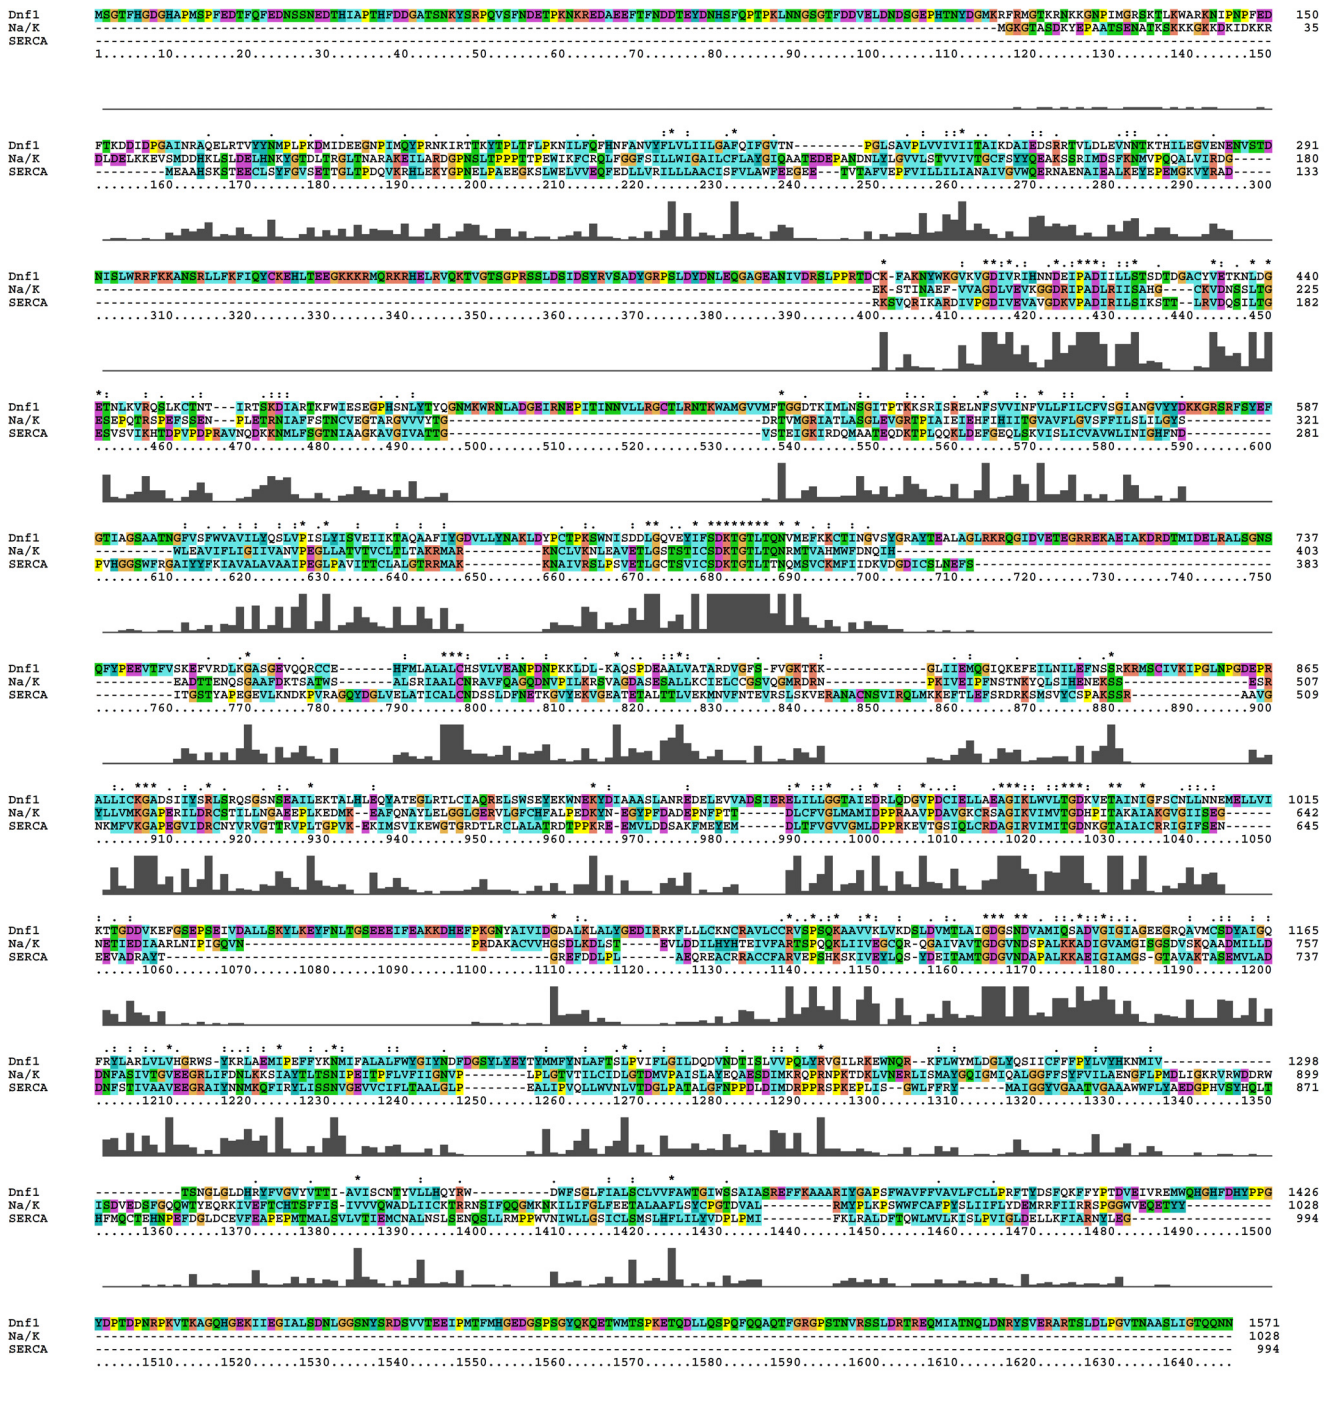

Figure S9. Alignment of Dnf1, Na<sup>+</sup>/K<sup>+</sup> ATPase and SERCA used to generate the structural model. Image generated with Clustal X v2.0 (1).

1. Larkin MA, et al. (2007). Clustal W and Clustal X version 2.0. *Bioinformatics* 23:2947-2948.

**Table S1. Yeast strains used in this study**

| Strain    | Genotype                                                                          | Plasmid                                 | Source     |
|-----------|-----------------------------------------------------------------------------------|-----------------------------------------|------------|
| BY4741    | MATa <i>his3Δ1 leu2Δ0 ura3Δ0 met15Δ0</i>                                          |                                         | Invitrogen |
| BY4742    | MATa <i>his3Δ1 leu2Δ0 ura3Δ0 lys2Δ0</i>                                           |                                         | Invitrogen |
| PFY3275F  | MATa <i>his3Δ1 leu2Δ0 ura3Δ0 met15Δ0 dnf1Δ dnf2Δ</i>                              |                                         | (1)        |
| SCY119    | MATa <i>his3Δ1 leu2Δ0 ura3Δ0 met15Δ0 lem3Δ</i>                                    |                                         | This study |
| ZHY615M2D | MATa <i>his3Δ1 leu2Δ0 ura3Δ0 lys2Δ0 drs2Δ</i>                                     |                                         | (1)        |
| ZHY709    | MATa <i>his3Δ1 leu2Δ0 ura3Δ0 met15Δ0 dnf1Δ dnf2Δ drs2Δ::LEU2</i>                  |                                         | (1)        |
| ZHY704    | MATa <i>his3Δ1 leu2Δ0 ura3Δ0 lys2Δ0 dnf1Δ dnf2Δ dnf3Δ drs2Δ::LEU2 pRS416-DRS2</i> | pRS416-DRS2                             | (1)        |
| XZY0035   | BY4742 <i>CDC50::KanMX4-GPD atp2 Δ::URA3</i>                                      |                                         | This study |
| RBY201    | ZHY704                                                                            | pRS313                                  | This study |
| RBY204    | ZHY704                                                                            | pRS313-DNF1                             | This study |
| RBY240    | ZHY704                                                                            | pRS313-Dnf1[TM1-2]                      | This study |
| RBY255    | ZHY704                                                                            | pRS313-Dnf1[TM3-4]                      | This study |
| RBY2100   | ZHY704                                                                            | pRS313-Dnf1[TM5-6]                      | This study |
| RBY2121   | ZHY704                                                                            | pRS313-Dnf1[TM7-10]                     | This study |
| RBY2130   | ZHY704                                                                            | pRS313-Dnf1[TM1-10]                     | This study |
| RBY264    | ZHY704                                                                            | pRS313-Dnf1[TM3]                        | This study |
| RBY267    | ZHY704                                                                            | pRS313-Dnf1[LL3-4]                      | This study |
| RBY261    | ZHY704                                                                            | pRS313-Dnf1[TM4]                        | This study |
| RBY282    | ZHY704                                                                            | pRS313-Dnf1[WVAV->LTFW]                 | This study |
| RBY285    | ZHY704                                                                            | pRS313-Dnf1[YQS->FSN]                   | This study |
| RBY288    | ZHY704                                                                            | pRS313-Dnf1[YIS->FVT]                   | This study |
| RBY2177   | ZHY704                                                                            | pRS313-Dnf1 Y618F                       | This study |
| RBY2180   | ZHY704                                                                            | pRS313-Dnf1 I619V                       | This study |
| RBY2183   | ZHY704                                                                            | pRS313-Dnf1 S620T                       | This study |
| RBY2308   | ZHY704                                                                            | pRS313-Dnf1 F587Y                       | This study |
| RBY2311   | ZHY704                                                                            | pRS313-Dnf1 F587L                       | This study |
| RBY2200   | ZHY704                                                                            | pRS313-DRS2                             | This study |
| RBY2203   | ZHY704                                                                            | pRS313-Drs2 F511Y                       | This study |
| RBY2209   | ZHY704                                                                            | pRS313-Drs2 F511L                       | This study |
| RBY2810   | SCY119                                                                            | pRS416-GFP-DNF1 +pRS425-CDC50           | This study |
| RBY2812   | SCY119                                                                            | pRS416-GFP-DNF1 +pRS425-LEM3            | This study |
| RBY2814   | SCY119                                                                            | pRS416-GFP-Dnf1[TM1-2] +pRS425-CDC50    | This study |
| RBY2816   | SCY119                                                                            | pRS416-GFP-Dnf1[TM1-2] +pRS425-LEM3     | This study |
| RBY2818   | SCY119                                                                            | pRS416-GFP-Dnf1[TM3-4] +pRS425-CDC50    | This study |
| RBY2820   | SCY119                                                                            | pRS416-GFP-Dnf1[TM3-4] +pRS425-LEM3     | This study |
| RBY2826   | SCY119                                                                            | pRS416-GFP-Dnf1[TM4] +pRS425-CDC50      | This study |
| RBY2828   | SCY119                                                                            | pRS416-GFP-Dnf1[TM4] +pRS425-LEM3       | This study |
| RBY2838   | SCY119                                                                            | pRS416-GFP-Dnf1[YIS->FVT] +pRS425-CDC50 | This study |
| RBY2840   | SCY119                                                                            | pRS416-GFP-Dnf1[YIS->FVT] +pRS425-LEM3  | This study |
| RBY2842   | SCY119                                                                            | pRS416-GFP-Dnf1 Y618F +pRS425-CDC50     | This study |
| RBY2844   | SCY119                                                                            | pRS416-GFP-Dnf1 Y618F +pRS425-LEM3      | This study |
| RBY3210   | XZY0035                                                                           | pRS313-GPD-TAP2-Drs2                    | This study |
| RBY3213   | XZY0035                                                                           | pRS313-GPD-TAP2-Drs2 F511Y              | This study |
| RBY3216   | XZY0035                                                                           | pRS313-GPD-TAP2-Drs2 F511L              | This study |
| RBY3506   | ZHY615M2D                                                                         | pRS313-DNF1                             | This study |
| RBY3527   | ZHY615M2D                                                                         | pRS313-Dnf1 Y618F                       | This study |
| RBY3901   | ZHY615M2D                                                                         | pRS313                                  | This study |
| RBY3904   | ZHY615M2D                                                                         | pRS313-DRS2                             | This study |
| RBY3907   | ZHY615M2D                                                                         | pRS313-Drs2 F511Y                       | This study |
| RBY3913   | ZHY615M2D                                                                         | pRS313-Drs2 F511L                       | This study |
| RBY4503   | ZHY709                                                                            | pRS313                                  | This study |
| RBY4506   | ZHY709                                                                            | pRS313-DRS2                             | This study |
| RBY4509   | ZHY709                                                                            | pRS313-DNF1                             | This study |
| RBY4518   | ZHY709                                                                            | pRS313-Dnf1[YIS->FVT]                   | This study |
| RBY4521   | ZHY709                                                                            | pRS313-Dnf1 Y618F                       | This study |

**Table S1. Cont.**

| Strain  | Genotype                       | Plasmid                                               | Source     |
|---------|--------------------------------|-------------------------------------------------------|------------|
| RBY501  | PFY3275F                       | pRS416-GFP-DNF1 + pRS425-LEM3                         | This study |
| RBY537  | PFY3275F                       | pRS416-GFP-Dnf1[TM1-2] +pRS425-LEM3                   | This study |
| RBY565  | PFY3275F                       | pRS416-GFP-Dnf1[TM3-4] +pRS425-LEM3                   | This study |
| RBY571  | PFY3275F                       | pRS416-GFP-Dnf1[TM5-6] +pRS425-LEM3                   | This study |
| RBY574  | PFY3275F                       | pRS416-GFP-Dnf1[TM7-10] +pRS425-LEM3                  | This study |
| RBY577  | PFY3275F                       | pRS416-GFP-Dnf1[TM1-10] +pRS425-LEM3                  | This study |
| RBY559  | PFY3275F                       | pRS416-GFP-Dnf1[TM3] +pRS425-LEM3                     | This study |
| RBY562  | PFY3275F                       | pRS416-GFP-Dnf1[LL3-4] +pRS425-LEM3                   | This study |
| RBY556  | PFY3275F                       | pRS416-GFP-Dnf1[TM4] +pRS425-LEM3                     | This study |
| RBY601  | PFY3275F                       | pRS313                                                | This study |
| RBY604  | PFY3275F                       | pRS313-DNF1                                           | This study |
| RBY640  | PFY3275F                       | pRS313-Dnf1[TM1-2]                                    | This study |
| RBY667  | PFY3275F                       | pRS313-Dnf1[TM3-4]                                    | This study |
| RBY6100 | PFY3275F                       | pRS313-Dnf1[TM5-6]                                    | This study |
| RBY6121 | PFY3275F                       | pRS313-Dnf1[TM7-10]                                   | This study |
| RBY6130 | PFY3275F                       | pRS313-Dnf1[TM1-10]                                   | This study |
| RBY676  | PFY3275F                       | pRS313-Dnf1[TM3]                                      | This study |
| RBY679  | PFY3275F                       | pRS313-Dnf1[LL3-4]                                    | This study |
| RBY673  | PFY3275F                       | pRS313-Dnf1[TM4]                                      | This study |
| RBY682  | PFY3275F                       | pRS313-Dnf1[WVAV->LTFW]                               | This study |
| RBY685  | PFY3275F                       | pRS313-Dnf1[YQS->FSN]                                 | This study |
| RBY688  | PFY3275F                       | pRS313-Dnf1[YIS->FVT]                                 | This study |
| RBY6151 | PFY3275F                       | pRS313-Dnf1 Y618F                                     | This study |
| RBY6154 | PFY3275F                       | pRS313-Dnf1 I619V                                     | This study |
| RBY6157 | PFY3275F                       | pRS313-Dnf1 S620T                                     | This study |
| RBY6160 | PFY3275F                       | pRS313-Dnf1 Y618L                                     | This study |
| RBY6200 | PFY3275F                       | pRS313-Dnf1 F587Y                                     | This study |
| RBY6203 | PFY3275F                       | pRS313-Dnf1 F587L                                     | This study |
| RBY658  | PFY3275F                       | pRS313-Dnf1[TM1-4]                                    | This study |
| RBY6172 | PFY3275F                       | pRS313-Dnf1[YIS->YVT]                                 | This study |
| RBY6175 | PFY3275F                       | pRS313-Dnf1[YIS->FIT]                                 | This study |
| RBY6178 | PFY3275F                       | pRS313-Dnf1[YIS->FVS]                                 | This study |
| RBY6503 | PFY3275F                       | pRS313-Flag3-DNF1                                     | This study |
| RBY6506 | PFY3275F                       | pRS313-Flag3-Dnf1 Y618F                               | This study |
| RBY6509 | PFY3275F                       | pRS313-Flag3-Dnf1[YIS->FVT]                           | This study |
| RBY9604 | PFY3275F                       | +pRS416-GFP-Drs2 +pRS425-Cdc50 +pRS313                | This study |
| RBY9607 | PFY3275F                       | +pRS416-GFP-Drs2 +pRS425-Cdc50 +pRS313-Dnf1           | This study |
| RBY9610 | PFY3275F                       | +pRS416-GFP-Drs2 +pRS425-Cdc50 +pRS313-Dnf1[TM3-4]    | This study |
| RBY9613 | PFY3275F                       | +pRS416-GFP-Drs2 +pRS425-Cdc50 +pRS313-Dnf1[TM4]      | This study |
| RBY9616 | PFY3275F                       | +pRS416-GFP-Drs2 +pRS425-Cdc50 +pRS313-Dnf1[YIS->FVT] | This study |
| RBY9619 | PFY3275F                       | +pRS416-GFP-Drs2 +pRS425-Cdc50 +pRS313-Dnf1 Y618F     | This study |
| RBY9701 | PFY3275F <i>lem3Δ::natNT2</i>  |                                                       | This study |
| RBY9707 | RBY9701                        | pRS313                                                | This study |
| RBY9710 | RBY9701                        | pRS313-DNF1                                           | This study |
| RBY9716 | RBY9701                        | pRS313-Dnf1[TM4]                                      | This study |
| RBY9719 | RBY9701                        | pRS313-Dnf1[YIS->FVT]                                 | This study |
| RBY9722 | RBY9701                        | pRS313-Dnf1 Y618F                                     | This study |
| RBY9750 | PFY3275F <i>cdc50Δ::natNT2</i> |                                                       | This study |
| RBY9756 | RBY9750                        | pRS313                                                | This study |
| RBY9759 | RBY9750                        | pRS313-DNF1                                           | This study |
| RBY9765 | RBY9750                        | pRS313-Dnf1[TM4]                                      | This study |
| RBY9768 | RBY9750                        | pRS313-Dnf1[YIS->FVT]                                 | This study |
| RBY9771 | RBY9750                        | pRS313-Dnf1 Y618F                                     | This study |

1. Hua Z, Fatheddin P, Graham TR (2002) An essential subfamily of Drs2p-related P-type ATPases is required for protein trafficking between Golgi complex and endosomal/vacuolar system. *Mol Biol Cell* 13:3162-3177.



**Table S2. Plasmids used in this study**

| Plasmid                     | Notes                                                                                                                   | Source     |
|-----------------------------|-------------------------------------------------------------------------------------------------------------------------|------------|
| pRS313                      |                                                                                                                         | (1)        |
| pRS313-DNF1                 |                                                                                                                         | (2)        |
| pRS313-Dnf1[TM1-2]          | N210-I260 replaced with F217-I267 (from Drs2)                                                                           | This study |
| pRS313-Dnf1[TM3-4]          | I545-S620 replaced with V440-T513 (from Drs2)                                                                           | This study |
| pRS313-Dnf1[TM5-6]          | L1184-L1240 replaced with I1008-F1064 (from Drs2)                                                                       | This study |
| pRS313-Dnf1[TM7-10]         | L1271-R1393 replaced with W1095-D1220 (from Drs2)                                                                       | This study |
| pRS313-Dnf1[TM1-10]         | N210-I260, I545-S620, L1184-L1240, L1271-R1393 replaced with F217-I267, V440-T513, I1008-F1064, W1095-D1220 (from Drs2) | This study |
| pRS313-Dnf1[TM3]            | I545-Y574 replaced with V440-M469 (from Drs2)                                                                           | This study |
| pRS313-Dnf1[LL3-4]          | Y575-F602 replaced with S470-F495 (from Drs2)                                                                           | This study |
| pRS313-Dnf1[TM4]            | W603-S620 replaced with L496-T513 (from Drs2)                                                                           | This study |
| pRS313-Dnf1[WVAV->LTFW]     | W603L, V604T, A605F, V606W                                                                                              | This study |
| pRS313-Dnf1[YQS->FSN]       | Y609F, Q610S, S611N                                                                                                     | This study |
| pRS313-Dnf1[YIS->FVT]       | Y618F, I619V, S620T                                                                                                     | This study |
| pRS313-Dnf1 Y618F           | Y618F                                                                                                                   | This study |
| pRS313-Dnf1 I619V           | I619V                                                                                                                   | This study |
| pRS313-Dnf1 S620T           | S620T                                                                                                                   | This study |
| pRS313-Dnf1 Y618L           | Y618L                                                                                                                   | This study |
| pRS313-Dnf1 F587Y           | F587Y                                                                                                                   | This study |
| pRS313-Dnf1 F587L           | F587L                                                                                                                   | This study |
| pRS313-Dnf1[TM1-4]          | N210-I260, I545-S620 replaced with F217-I267, V440-T513 (from Drs2)                                                     | This study |
| pRS313-Dnf1[YIS->YVT]       | I619V, S620T                                                                                                            | This study |
| pRS313-Dnf1[YIS->FIT]       | Y618F, S620T                                                                                                            | This study |
| pRS313-Dnf1[YIS->FVS]       | Y618F, I619V                                                                                                            | This study |
| pRS313-DRS2                 |                                                                                                                         | (3)        |
| pRS313-Drs2 F511Y           | F511Y                                                                                                                   | This study |
| pRS313-Drs2 F511L           | F511L                                                                                                                   | This study |
| pRS313-Flag3-DNF1           | N-terminal 3xFlag fusion, <i>DNF1</i> promoter                                                                          | This study |
| pRS313-Flag3-Dnf1[YIS->FVT] | Y618F, I619V, S620T                                                                                                     | This study |
| pRS313-Flag3-Dnf1 Y618F     | Y618F                                                                                                                   | This study |
| pRS416-DRS2                 |                                                                                                                         | (4)        |
| pRS416-GFP-DNF1             | N-terminal GFP fusion, <i>PRC1</i> promoter                                                                             | This study |
| pRS416-GFP-Dnf1[TM1-2]      | N210-I260 replaced with F217-I267 (from Drs2)                                                                           | This study |
| pRS416-GFP-Dnf1[TM3-4]      | I545-S620 replaced with V440-T513 (from Drs2)                                                                           | This study |
| pRS416-GFP-Dnf1[TM5-6]      | L1184-L1240 replaced with I1008-F1064 (from Drs2)                                                                       | This study |
| pRS416-GFP-Dnf1[TM7-10]     | L1271-R1393 replaced with W1095-D1220 (from Drs2)                                                                       | This study |
| pRS416-GFP-Dnf1[TM1-10]     | N210-I260, I545-S620, L1184-L1240, L1271-R1393 replaced with F217-I267, V440-T513, I1008-F1064, W1095-D1220 (from Drs2) | This study |
| pRS416-GFP-Dnf1[TM3]        | I545-Y574 replaced with V440-M469 (from Drs2)                                                                           | This study |
| pRS416-GFP-Dnf1[LL3-4]      | Y575-F602 replaced with S470-F495 (from Drs2)                                                                           | This study |
| pRS416-GFP-Dnf1[TM4]        | W603-S620 replaced with L496-T513 (from Drs2)                                                                           | This study |
| pRS416-GFP-Dnf1[YIS->FVT]   | Y618F, I619V, S620T                                                                                                     | This study |
| pRS416-GFP-Dnf1 Y618F       | Y618F                                                                                                                   | This study |
| pRS425-CDC50                |                                                                                                                         | (5)        |
| pRS425-LEM3                 |                                                                                                                         | This study |

1. Sikorski RS, Hieter P (1989) A system of shuttle vectors and yeast host strains designed for efficient manipulation of DNA in *Saccharomyces cerevisiae*. *Genetics* 122:19-27.
2. Liu K, Hua Z, Nepute JA, Graham TR (2007) Yeast P4-ATPases Drs2p and Dnf1p are essential cargos of the NPFXD/Sla1p endocytic pathway. *Mol Biol Cell* 18:487-500.
3. Natarajan P, Wang J, Hua Z, Graham TR (2004) Drs2p-coupled aminophospholipid translocase activity in yeast Golgi membranes and relationship to in vivo function. *Proc Natl Acad Sci USA* 101:10614-10619.
4. Hua Z, Fatheddin P, Graham TR (2002) An essential subfamily of Drs2p-related P-type ATPases is required for protein trafficking between Golgi complex and endosomal/vacuolar system. *Mol Biol Cell* 13:3162-3177.
5. Chen S, et al. (2006) Roles for the Drs2p-Cdc50p complex in protein transport and phosphatidylserine asymmetry of the yeast plasma membrane. *Traffic* 7:1503-1517.

**Table S3. Primers used in this study**

| Primer             | Sequence (5'->3')                                  | For creation of constructs |
|--------------------|----------------------------------------------------|----------------------------|
| Dnf1(rev)SOE1      | AAATTCTTGGAAACAAAAATTTTGGTAAGAATGTTAACGGGG         | Dnf1[TM1-2]                |
| Dnf1(forw)SOE3     | GCCATGAAGGAATGTATCGAAGACTCAAGAAGAACCCTCCTAG        | Dnf1[TM1-2]                |
| Dnf1(rev)SOE6      | GTTGATAATTTTCTCAACCCTGGACTTCTTGGTGGGTG             | Dnf1[TM3-4], Dnf1[TM3]     |
| Dnf1(rev)SOE8      | TAGAATCCAAAATGTTAAAAATGAGACGAAACCCTTTGTC           | Dnf1[TM4]                  |
| Dnf1 (forw) SOE8   | ggcttattctcaaagacTTTTGGGTTGCTGTTATTCTTTACC         | Dnf1[LL3-4]                |
| Dnf1(forw)SOE9     | ATTTCTCTATTTGTCACCGTGGAGATCATCAAACTGCACA           | Dnf1[TM3-4], Dnf1[TM4]     |
| Dnf1 (rev) SOE10   | ttggcatctgcagtagaATATACACCATTGCAATACCAGAAAC        | Dnf1[LL3-4]                |
| Dnf1 (forw) SOE10  | attggaatggtattatgTACGACAAAAAGGCAGATCAC             | Dnf1[TM3]                  |
| Dnf1 (rev) SOE11   | CAAAATTGCGACAGAAAATCTCTTATAAGACCACCTACCGTGAAC      | Dnf1[TM5-6]                |
| Dnf1 (forw) SOE13  | TTTGTCAATTGGTGTATTTGACCAGGACGTGAATGACACA           | Dnf1[TM5-6]                |
| Dnf1 (rev) SOE18   | ATTAATAATCCATCCCCAGAACCTTTCTTTGGTTCCATTCTTTC       | Dnf1[TM7-10]               |
| Dnf1 (forw) SOE20  | TTTGCACCTGGTAAGAGATTTACATATGACAGTTTTCAAAAATTTTTTC  | Dnf1[TM7-10]               |
| Dnf1(forw) WVAVmut | AACGGTTTCGTCTCATTttaaatttggATTCTTTACCAATCTTTA      | Dnf1[WVAV->LTFW]           |
| Dnf1(rev) WVAVmut  | TAAAGATTGGTAAAGAATccaataatgtaaAAATGAGACGAAACCCTT   | Dnf1[WVAV->LTFW]           |
| Dnf1 (forw) YQSmut | TGGGTTGCTGTTATTCTTTttcgaaTTAGTCCCAATCTCTTTG        | Dnf1[YQS->FSN]             |
| Dnf1 (rev) YQSmut  | CAAAGAGATTGGGACTAAAtcgaaaAAAGAATAACAGCAACCCA       | Dnf1[YQS->FSN]             |
| Dnf1 (forw) YISmut | CTTTAGTCCCAATCTCTTTGtttaccGTGGAGATCATCAAACTGC      | Dnf1[YIS->FVT]             |
| Dnf1 (rev) YISmut  | GCAGTTTTGATGATCTCCACAGAgacTACAAAGAGATTGGGACTAAAG   | Dnf1[YIS->FVT]             |
| Dnf1(forw)Y618F    | CTTTAGTCCCAATCTCTTTGtttATTCTGTGGAGATCATCAAAAC      | Dnf1 Y618F                 |
| Dnf1(rev)Y618F     | GTTTTGATGATCTCCACAGAAAATaaACAAAGAGATTGGGACTAAAG    | Dnf1 Y618F                 |
| Dnf1(forw)l619V    | TAGTCCCAATCTCTTTGTACgtcTCTGTGGAGATCATCAAAAC        | Dnf1 l619V                 |
| Dnf1(rev)l619V     | GTTTTGATGATCTCCACAGAgacTACAAAGAGATTGGGACTA         | Dnf1 l619V                 |
| Dnf1(forw)S620T    | GTCCCAATCTCTTTGTACATTaccGTGGAGATCATCAAACTGC        | Dnf1 S620T                 |
| Dnf1(rev)S620T     | GCAGTTTTGATGATCTCCACggtAATGTACAAAGAGATTGGGAC       | Dnf1 S620T                 |
| Dnf1(forw)Y618L    | CTTTAGTCCCAATCTCTTTGttgATTCTGTGGAGATCATCAAAAC      | Dnf1 Y618L                 |
| Dnf1(rev)Y618L     | GTTTTGATGATCTCCACAGAAAATcaACAAAGAGATTGGGACTAAAG    | Dnf1 Y618L                 |
| Dnf1(forw)YIS->YVT | CTTTAGTCCCAATCTCTTTGTACgtcaccGTGGAGATCATCAAACTGC   | Dnf1[YIS->YVT]             |
| Dnf1(rev)YIS->YVT  | GCAGTTTTGATGATCTCCACggtgacGTACAAAGAGATTGGGACTAAAG  | Dnf1[YIS->YVT]             |
| Dnf1(forw)YIS->FIT | CTTTAGTCCCAATCTCTTTGtttATTaccGTGGAGATCATCAAACTGC   | Dnf1[YIS->FIT]             |
| Dnf1(rev)YIS->FIT  | GCAGTTTTGATGATCTCCACggtAATaaaACAAAGAGATTGGGACTAAAG | Dnf1[YIS->FIT]             |
| Dnf1(forw)YIS->FVS | CTTTAGTCCCAATCTCTTTGtttaccGTGGAGATCATCAAACTGC      | Dnf1[YIS->FVS]             |
| Dnf1(rev)YIS->FVS  | GCAGTTTTGATGATCTCCACAGAgacaaaACAAAGAGATTGGGACTAAAG | Dnf1[YIS->FVS]             |
| Dnf1(forw) +Kpnl   | GACGACGGTACCTCTGGAACTTTTCATGGCG                    | GFP-Dnf1                   |
| Dnf1(rev) +Kpnl    | GACGACGGTACCTATTAATTTGTTCTGTTGTGTTCCGA             | GFP-Dnf1                   |
| Drs2(forw)SOE1     | TTAACATTCTTACCAAAAATTTTTGTTCCAAGAATTTTCCAAA        | Dnf1[TM1-2]                |
| Drs2(rev)SOE3      | GGTCTTCTTGAGTCTTCGATACATTCTTCATGGCAGAAAC           | Dnf1[TM1-2]                |
| Drs2(forw)SOE6     | CCCACCAAGAAGTCCAGGGTTGAGAAAATTATCAACAGACAGATTATTC  | Dnf1[TM3-4], Dnf1[TM3]     |
| Drs2(forw)SOE8     | AACGGTTTCGTCTCATTttaaatttggATTCTTTCAAAATCGAATC     | Dnf1[TM4]                  |
| Drs2 (rev) SOE8    | aataacagcaacccaaaaGTCTTTGAAGAATAAGCCAGCCTT         | Dnf1[LL3-4]                |
| Drs2(rev)SOE9      | AGTTTTGATGATCTCCACGGTGACAAATAGAGAAATAGGAACTAGATTC  | Dnf1[TM3-4], Dnf1[TM4]     |
| Drs2 (forw) SOE10  | attgcaaatggtgtatatTCTACTGCAGATGCCAAACATTT          | Dnf1[LL3-4]                |
| Drs2 (rev) SOE10   | tctgcctttttgtcgtaCATAATAACATTACCAATTGAAGAAATTAATA  | Dnf1[TM3]                  |
| Drs2 (forw) SOE11  | AGGTGGTCTTATAAGAGAATTTCTGTGCGCAATTTTGTACTCTTT      | Dnf1[TM5-6]                |
| Drs2 (rev) SOE13   | GTCATTACAGTCTGGTCAAATACACCAATGACAAAAGGGG           | Dnf1[TM5-6]                |
| Drs2 (forw) SOE18  | TGGAACCAAGAAAGTTCTGGGATGGATTATTAATGGC              | Dnf1[TM7-10]               |
| Drs2 (rev) SOE20   | AAAACCTGTCATATGTGAAATCTCTTACCAGTGCAAAAATTGG        | Dnf1[TM7-10]               |
| Drs2 (forw) F511Y  | CGAATCTAGTTCCTATTTCTCTATACGTCACCGTTGAATTAATC       | Drs2[F511Y]                |
| Drs2 (rev) F511Y   | GATTAATTCACCGGTGACGTATAGAGAAATAGGAACTAGATTCCG      | Drs2[F511Y]                |
| Drs2 (forw) F511L  | CGAATCTAGTTCCTATTTCTCTATTgTCCACCGTTGAATTAATC       | Drs2[F511L]                |
| Drs2 (rev) F511L   | GATTAATTCACCGGTGACcAATAGAGAAATAGGAACTAGATTCCG      | Drs2[F511L]                |
| Dnf1(forw)@1500    | TACTATTAATAACGTTCTGCTTCGTGG                        |                            |
| Dnf1(rev)@2297     | CATCTTTGTTGACTTCACCACTAGC                          |                            |

## SI Material and Methods

**Cloning.** GFP-Dnf1 was an N-terminal fusion generated by standard cloning of *DNF1* into the KpnI site in pRS416-GFP. KpnI sites were added to the 5' and 3' ends of *DNF1* by amplifying pRS313-*DNF1* with Dnf1 primers (Dnf1(forw)+KpnI and Dnf1(rev)+KpnI) to amplify a 4.7kb PCR fragment. The GFP-Dnf1 chimeras were generated by replacing the WT Dnf1 sequence through standard cloning using SphI and BseRI restriction sites from the pRS313 expression vectors (1).

**Plasmid Shuffling Assay.** A *dnf1,2,3Δdrs2Δ* strain harboring WT *DRS2* on a *URA3* plasmid was transformed with a second plasmid containing the *DNF1[DRS2]* chimera. When grown in the presence of 5-fluoroorotic acid (5FOA), any strain that is unable to lose the *URA3-DRS2* plasmid will die. Strains containing a Dnf1[Drs2] chimera capable of supporting growth of the *dnf1,2,3Δdrs2Δ* strain will be able to lose the *DRS2-URA3* plasmid and grow in the presence of 5FOA.

**Cell Extracts and Western Blotting.** Yeast containing N-terminal 3xFLAG tagged Dnf1 were grown in YPD to mid-log phase and harvested in SDS/urea sample buffer (40 mM Tris-HCl (pH 6.8), 8M urea, 0.1mM ethylenediaminetetraacetic acid, 1% 2-mercaptoethanol, 5% SDS and 0.25% bromophenol blue). 0.2OD cell lysate was separated by SDS-PAGE, transferred to PVDF membrane, and blotted with anti-FLAG M2 antibody (Sigma-Aldrich).

1. Sikorski RS, Hieter P (1989) A system of shuttle vectors and yeast host strains designed for efficient manipulation of DNA in *Saccharomyces cerevisiae*. *Genetics* 122:19-27.
